# Supplementary material for: Genistein treatment duration effects biomarkers of cell motility in human prostate
Source: PubMed Central journal article supplement (PMC6436751; doi:10.1371/journal.pone.0214078), 2019-03-27
Supplement: pone.0214078.s002.pdf [file pone.0214078.s002.pdf]

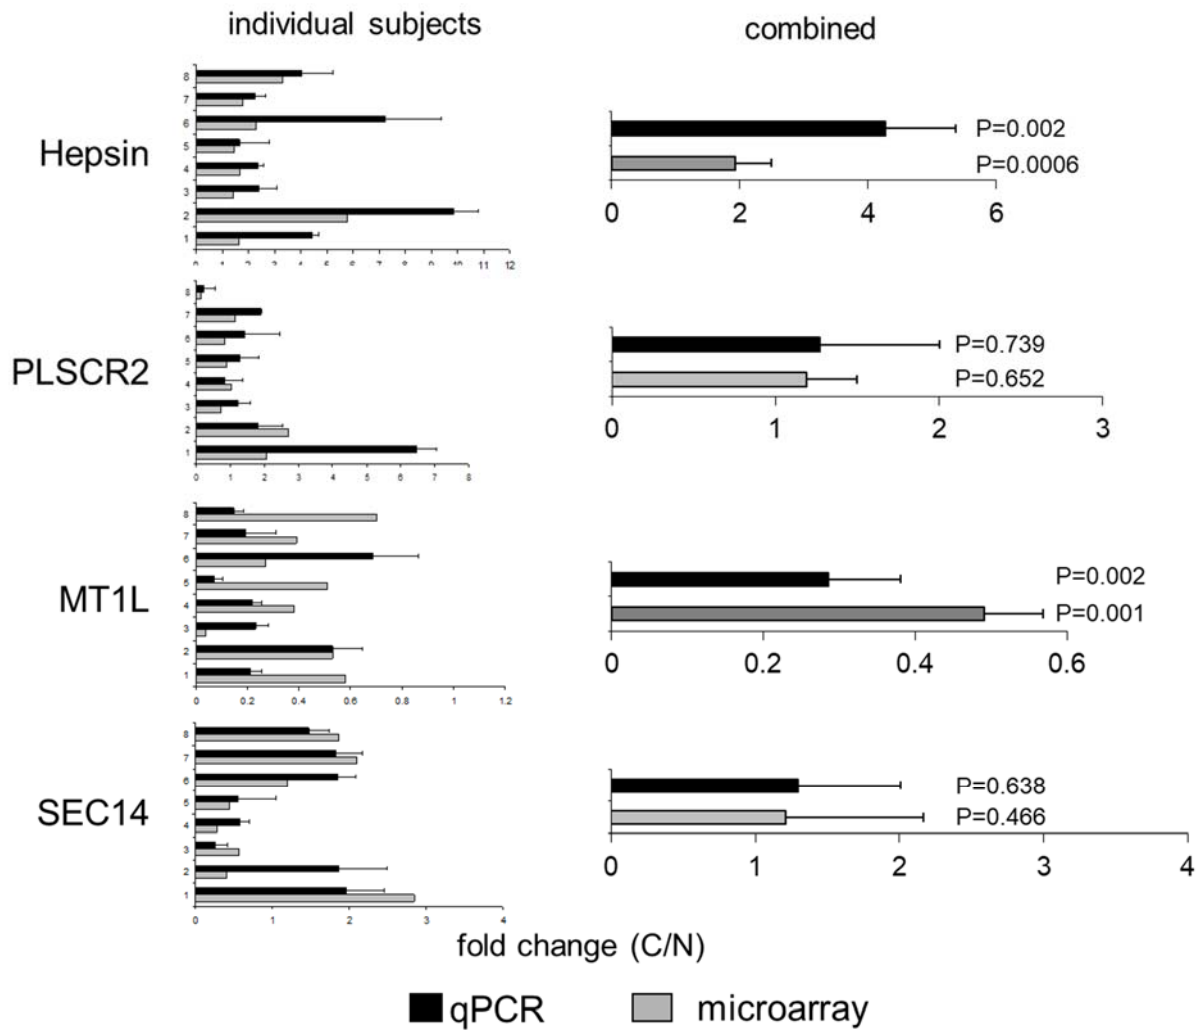

**S2 Fig. Evaluation of gene expression by qRT/PCR.** For each of four genes denoted, the left charts depict mean cancer/normal (C/N) ratio of gene expression for individual patients; the right charts are combined data. Gene expression for qRT/PCR was normalized to that of GAPDH, while that for microarray was Z normalized, as described in Methods. For individual subjects qRT/PCR was performed in replicates of N = 3, data are the mean  $\pm$  SEM, microarray was performed once, N = 1, the resultant data depicted, and combined values are from N = 8 subjects,

data are the mean  $\pm$  SEM. Student's 2-sided P-values for differences between cancer and normal are depicted.
