# Supplementary material for: Genistein treatment duration effects biomarkers of cell motility in human prostate
Source: PubMed Central journal article supplement (PMC6436751; doi:10.1371/journal.pone.0214078), 2019-03-27
Supplement: pone.0214078.s003.pdf [file pone.0214078.s003.pdf]

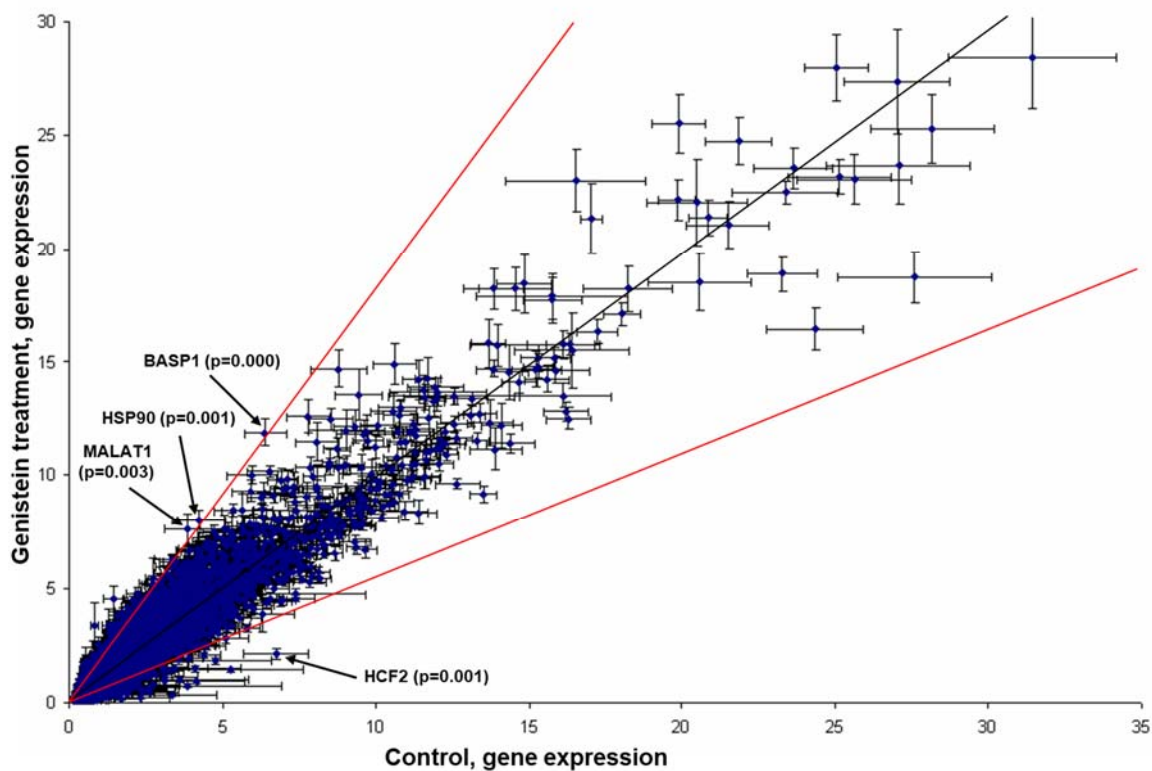

**S3 Fig. Differences in gene expression in normal epithelial cells in human prostate tissue between genistein treated and control subjects.** Gene expression was measured in normal prostate epithelial cells from N = 14 genistein treated and N = 14 control subjects, as in S1 Fig. Data are the mean  $\pm$  SEM of expression for each gene measured on the array. Lines denote 1.8 fold differences from the line of unity. Outlier genes, as defined in Methods, are denoted.
