# Supplementary material for: Genistein treatment duration effects biomarkers of cell motility in human prostate
Source: PubMed Central journal article supplement (PMC6436751; doi:10.1371/journal.pone.0214078), 2019-03-27
Supplement: pone.0214078.s004.pdf [file pone.0214078.s004.pdf]

Table. List of all genes with P value  $\leq 0.003$

| Gene symbol | GenBank accession | P-Value  | mean Z score |           | Z score of highest group* | Ratio (largest/smallest) |
|-------------|-------------------|----------|--------------|-----------|---------------------------|--------------------------|
|             |                   |          | control      | genistein |                           |                          |
| BASP1       | NM_006317         | 0.000008 | 6.40         | 11.89     | 11.89                     | 1.86                     |
| HSP90       | D87666            | 0.001259 | 4.25         | 8.02      | 8.02                      | 1.89                     |
| MALAT1      | AL050210          | 0.002622 | 3.88         | 7.59      | 7.59                      | 1.96                     |
| HCF2        | NM_000185         | 0.000754 | 6.74         | 2.11      | 6.74                      | 3.19                     |
| NDUFAF3     | AL049955          | 0.000182 | 3.34         | 6.26      | 6.26                      | 1.87                     |
| SHC2        | AB001451          | 0.000029 | 3.39         | 6.15      | 6.15                      | 1.82                     |
| SRRM2       | NM_016333         | 0.000335 | 2.72         | 5.22      | 5.22                      | 1.92                     |
| RPL3        | NM_000967         | 0.001032 | 2.73         | 5.14      | 5.14                      | 1.88                     |
| SFPQ        | NM_005066         | 0.001569 | 2.64         | 4.82      | 4.82                      | 1.82                     |
| CEBPD       | NM_005195         | 0.000250 | 2.25         | 4.77      | 4.77                      | 2.11                     |
| MARCKS      | AB020968          | 0.000449 | 2.60         | 4.69      | 4.69                      | 1.80                     |
| ARL6IP5     | NM_006407         | 0.000035 | 2.48         | 4.57      | 4.57                      | 1.84                     |
| ZC3H11A     | NM_014827         | 0.000014 | 2.08         | 4.50      | 4.50                      | 2.16                     |
| ARID2       | AB046777          | 0.000011 | 2.16         | 4.40      | 4.40                      | 2.03                     |
| IL10RB      | NM_000628         | 0.000632 | 2.32         | 4.40      | 4.40                      | 1.90                     |
| MIEF1       | NM_013298         | 0.001055 | 4.40         | 2.07      | 4.40                      | 2.12                     |
| PHIP        | NM_017934         | 0.000001 | 2.14         | 4.33      | 4.33                      | 2.02                     |
| ARPC2       | AF116702          | 0.000140 | 2.27         | 4.31      | 4.31                      | 1.90                     |
| PDE8B       | AF079529          | 0.000048 | 2.37         | 4.31      | 4.31                      | 1.82                     |
| ABHD11      | AF217971          | 0.000034 | 2.36         | 4.28      | 4.28                      | 1.82                     |
| PART1       | NM_016590         | 0.000778 | 2.28         | 4.26      | 4.26                      | 1.87                     |
| CYTH1       | NM_004762         | 0.000539 | 2.20         | 4.19      | 4.19                      | 1.90                     |
| MLLT1       | AL365410          | 0.001434 | 2.15         | 4.19      | 4.19                      | 1.95                     |
| PSMA2       | NM_002787         | 0.001004 | 2.18         | 4.17      | 4.17                      | 1.91                     |
| SNRNP25     | AK026593          | 0.000363 | 2.24         | 4.14      | 4.14                      | 1.85                     |
| ANKRD17     | AK025859          | 0.000105 | 2.21         | 4.04      | 4.04                      | 1.83                     |
| FSTL1       | NM_007085         | 0.000163 | 2.21         | 4.04      | 4.04                      | 1.82                     |
| SPATS2L     | NM_015535         | 0.000681 | 2.15         | 4.03      | 4.03                      | 1.87                     |
| ZNF697      | AK027019          | 0.000175 | 2.14         | 3.97      | 3.97                      | 1.85                     |
| SATB1       | NM_002971         | 0.000141 | 2.18         | 3.96      | 3.96                      | 1.82                     |
| TRIM13      | NM_005798         | 0.000104 | 2.06         | 3.87      | 3.87                      | 1.88                     |
| ZNF613      | AK023652          | 0.000196 | 2.11         | 3.81      | 3.81                      | 1.81                     |

\* top 3% is Z score  $\geq 6.72$

**S4 Fig. List of all genes with P  $\leq 0.003$  for the difference between genistein and control.**

The top four genes, BASP1, HSP90, MALAT1 and HCF2, meet the additional criteria to be identified as outlier genes.
