# Supplementary material for: Genistein treatment duration effects biomarkers of cell motility in human prostate
Source: PubMed Central journal article supplement (PMC6436751; doi:10.1371/journal.pone.0214078), 2019-03-27
Supplement: pone.0214078.s005.pdf [file pone.0214078.s005.pdf]

A

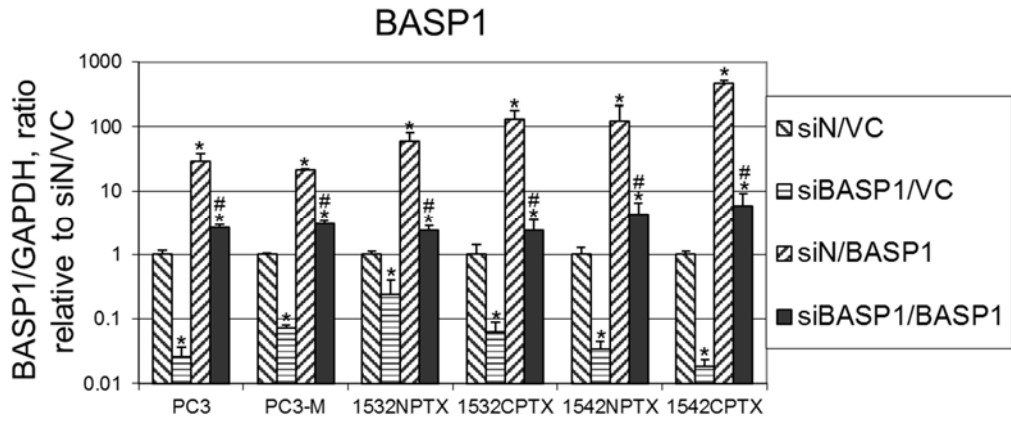

B

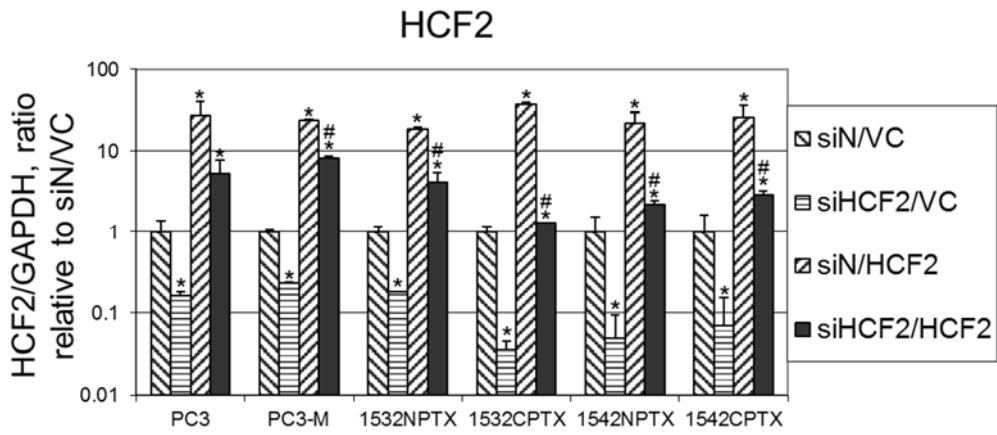

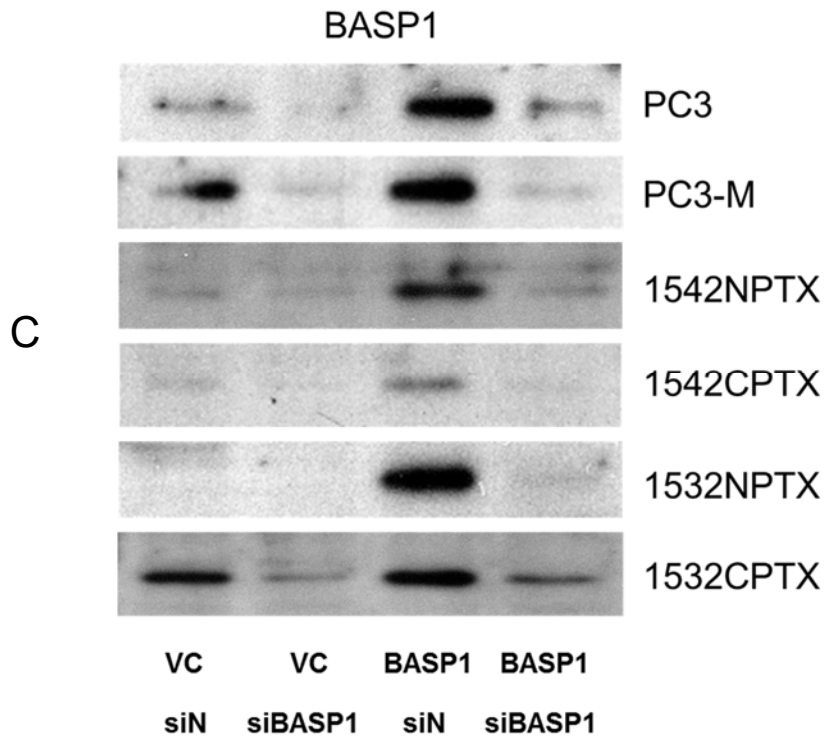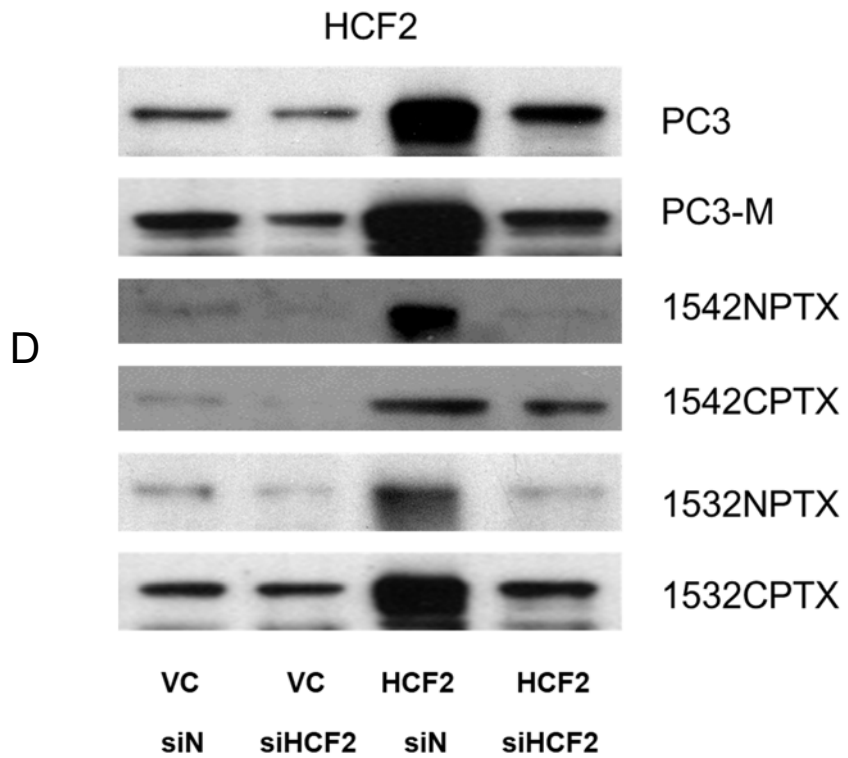

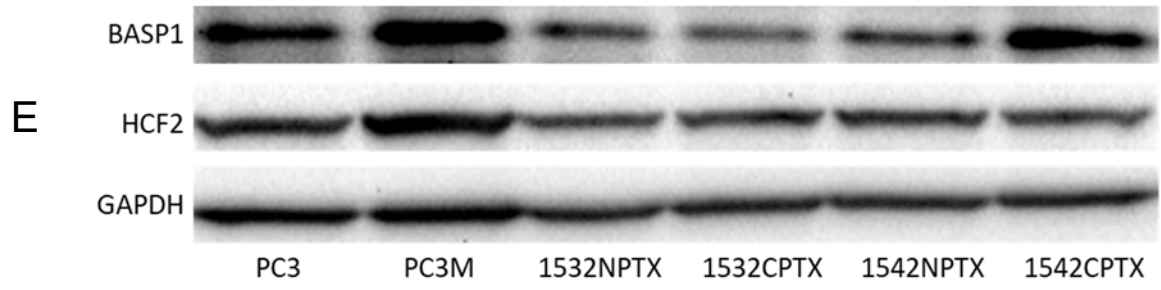

**S5 Fig. Effect of BASP1 and HCF2 knockdown and overexpression on respective transcript and protein levels.** The denoted human prostate cell lines were transfected with gene-specific siRNA, non-targeting siRNA (siN), with gene-specific vector and/or with empty vector control (VC), as indicated. **A and B)** Expression of transcripts was measured by qRT/PCR. Data are the mean  $\pm$  SD (replicates of N =2) level of expression, normalized to GAPDH, and expressed relative to that of control cells (i.e., siN/VC), which were set to 1.0; \* P < 0.05 compared to siN/VC, # P < 0.05 for comparison between siN/gene-specific vector and gene-specific siRNA/gene-specific vector. (Note, the comparison between siN/HCF and siHCF/HCF for PC3 cells was a trend, with two sided P = 0.07; one sided t-text P value 0.04) **C and D)** Protein expression was measured by Western blot. Representative blots from equally loaded lanes are depicted. **E.** comparison of BASP1 and HCF2 protein expression in native cell lines measured by Western blot.
