# Supplementary material for: Genistein treatment duration effects biomarkers of cell motility in human prostate
Source: PubMed Central journal article supplement (PMC6436751; doi:10.1371/journal.pone.0214078), 2019-03-27
Supplement: pone.0214078.s007.pdf [file pone.0214078.s007.pdf]

**A**

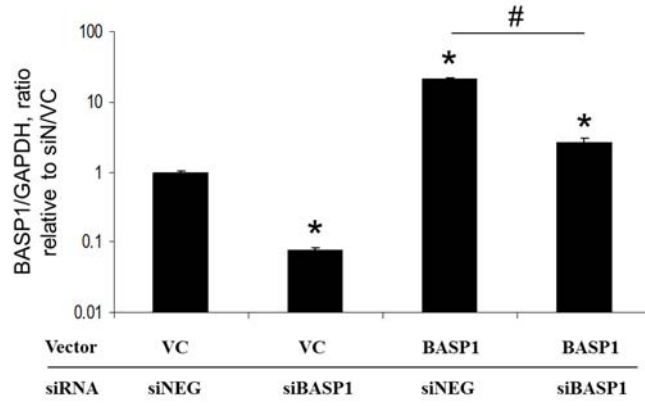

**B**

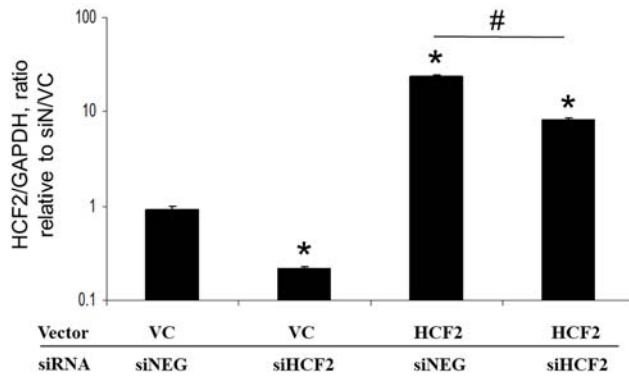

**C**

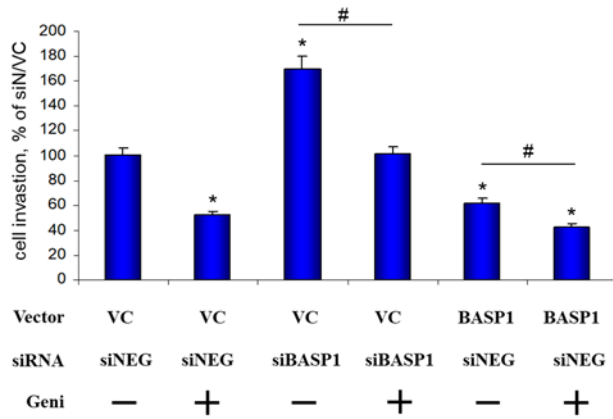

D

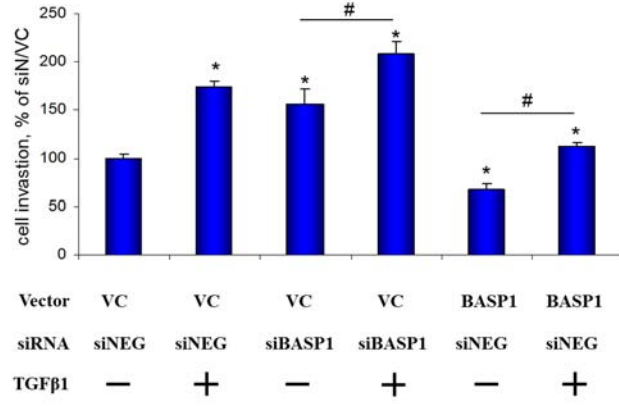

E

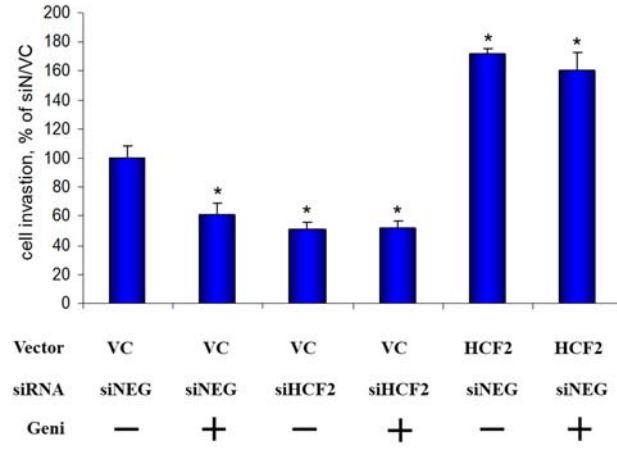

F

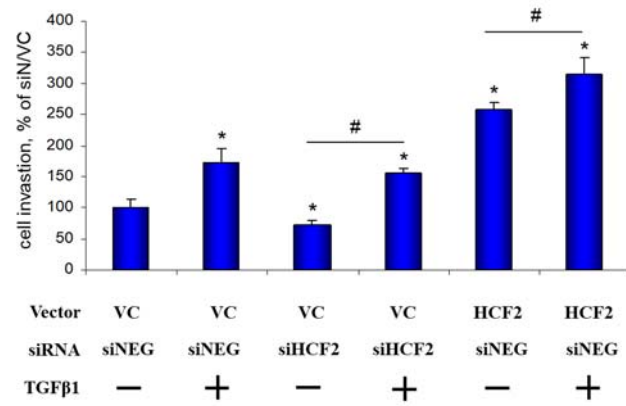

**S7 Fig. The effect of BASP1 and HCF2 on human prostate cell invasion and genistein efficacy.** PC3-M cells were transfected as in S3 Fig, treated with genistein or TGF $\beta$  as indicated. **A and B)** Expression of transcripts was measured by qRT/PCR, and data expressed as in S3 Fig. **C-F)** Cell invasion. Data from Boyden chamber cell invasion assays are the mean  $\pm$  SEM (replicates of N =4) cell invasion, expressed as the percent of control cells (i.e., siN/VC). \*denotes P  $\leq$  0.05 for 2-sided Student's t-test compared to control; # denotes P  $\leq$  0.05 for conditions denoted by line.
